# Supplementary material
Source: PubMed Central journal article supplement (PMC6784970)
Supplement: 41386_2019_340_MOESM1_ESM.pdf [file 41386_2019_340_MOESM1_ESM.pdf]

Opendak, et al.

Supplementary Fig. 1

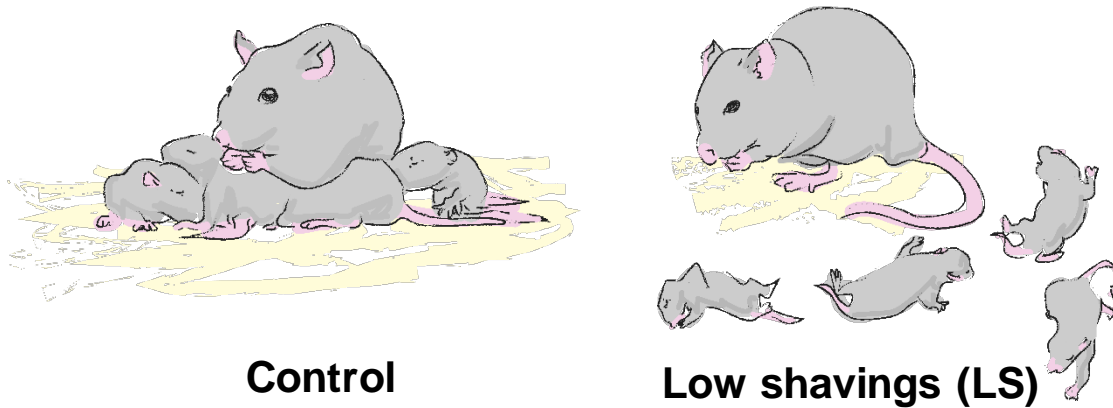

| <u>Percent of Observations in Which Behaviors Occurred</u> |           |                |
|------------------------------------------------------------|-----------|----------------|
|                                                            | <b>LS</b> | <b>Control</b> |
| <i>Abnormal behaviors</i>                                  |           |                |
| Rough handling                                             | 31.25%    | 0%             |
| Stepping on pups                                           | 68.75%    | 0%             |
| Pup vocalizations                                          | 56.25%    | 6.25%          |
| Scattered nest                                             | 43.75%    | 6.25%          |
| <i>Normal behaviors</i>                                    |           |                |
| Mother in nest                                             | 44.44%    | 79.49%         |
| Nursing                                                    | 65%       | 90%            |

**Figure S1. Frequency of behaviors during mother-pup interaction in Scarcity-Adversity model of abuse.** Reducing nest-building resources (“low shavings”, LS) is associated with rough handling of pups, decreased time in the nest and increased pup vocalizations, though pups gain weight normally.
