# Supplementary material
Source: PubMed Central journal article supplement (PMC6784970)
Supplement: 41386_2019_340_MOESM2_ESM.pdf [file 41386_2019_340_MOESM2_ESM.pdf]

Opendak, et al.

Supplementary Fig. 2

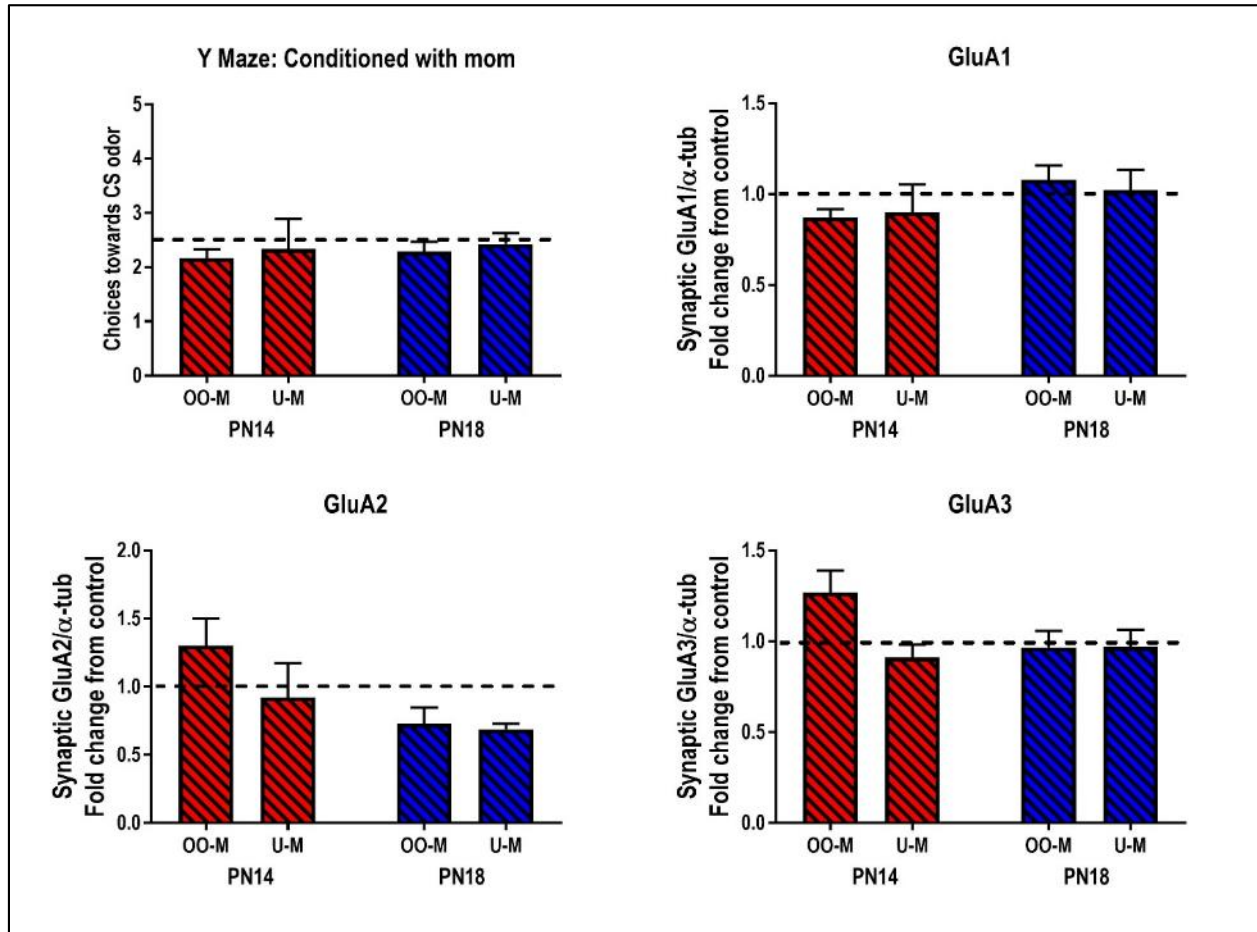

**Figure S2. Neurobehavioral effects of maternal presence during odor and unpaired conditioning.** Maternal presence did not affect behavioral threat expression (A) or AMPAR in the BLA (B-D) (all comparisons  $p > 0.05$ .) Dashed line: average protein expression in untrained “odor only” group (control). The same tubulin-corrected values were used for all markers probed. Comparisons were made across gels processed in parallel using samples derived from the same experiment. Full length blots/gels are presented in Supp. Figs. 4-7.
