# Supplementary material
Source: PubMed Central journal article supplement (PMC6784970)
Supplement: 41386_2019_340_MOESM3_ESM.pdf [file 41386_2019_340_MOESM3_ESM.pdf]

Supplementary Fig. 3

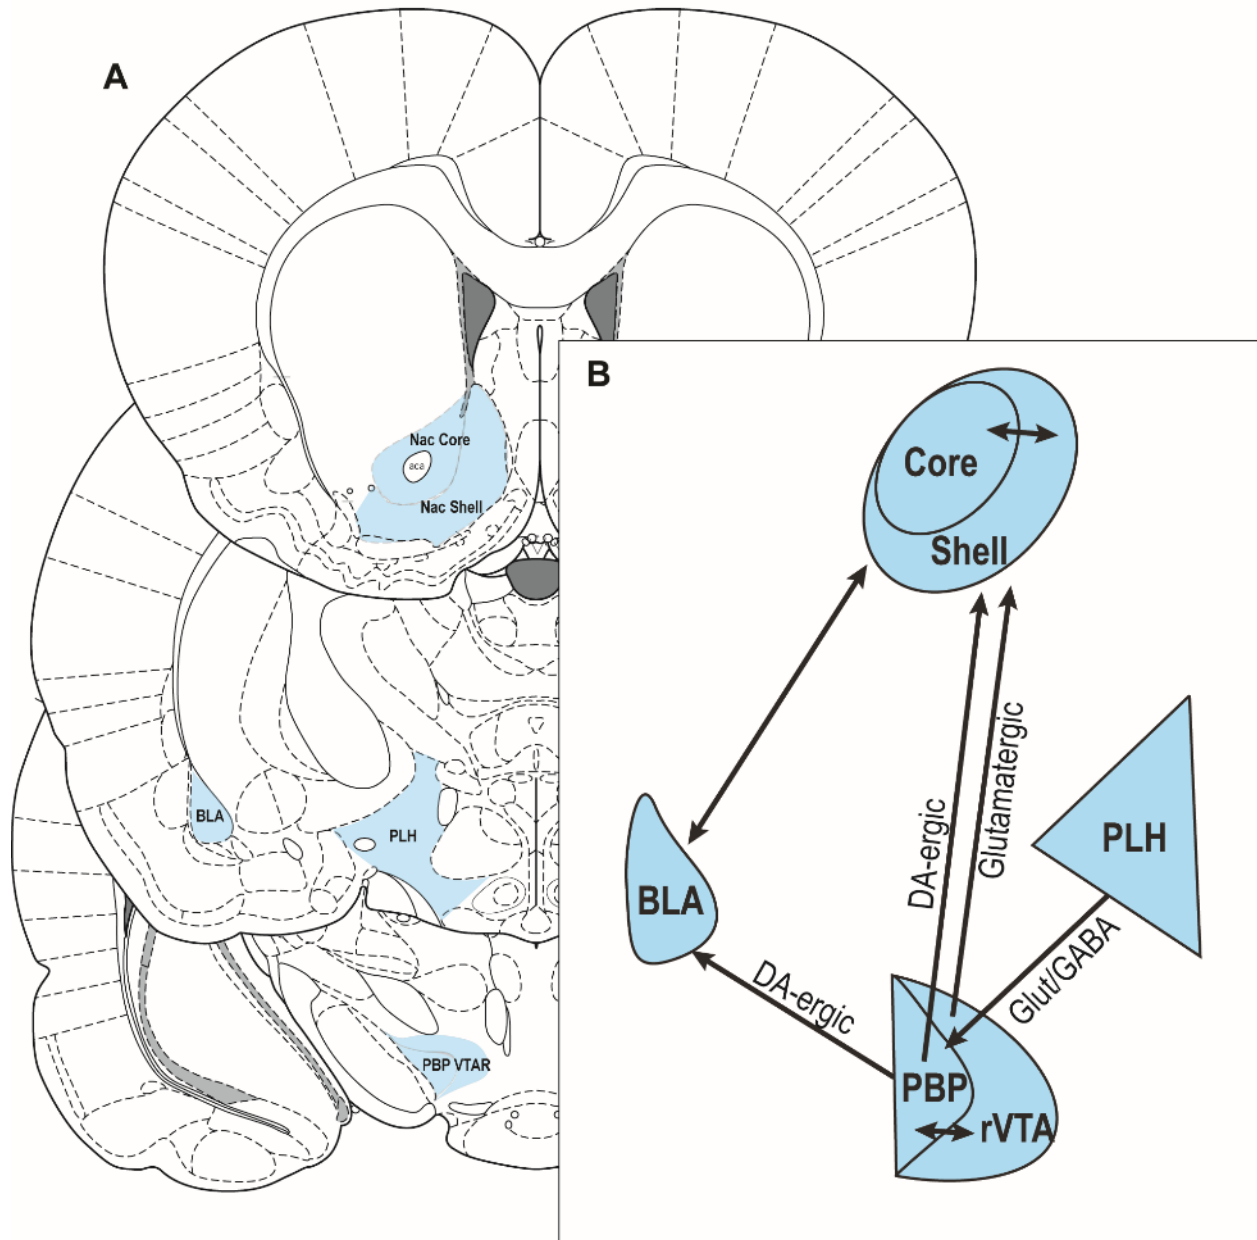

**Figure S3. Regions of interest (ROI) within mesolimbic dopamine circuit.** We performed metabolic mapping of 2-DG uptake brain regions providing inputs and outputs to basolateral amygdala (BLA) within neural threat circuit, including the peduncular lateral hypothalamus (PLH), parabrachial pigmented nucleus of VTA (PBP), rostral VTA (rVTA), and ventral striatum (Nac core and shell) (A). B, Simplified circuit diagram.
