# Supplementary material
Source: PubMed Central journal article supplement (PMC6784970)
Supplement: 41386_2019_340_MOESM4_ESM.pdf [file 41386_2019_340_MOESM4_ESM.pdf]

Opendak, et al.

Supplementary Figure 4.

GluA1 Blots (100 kD)

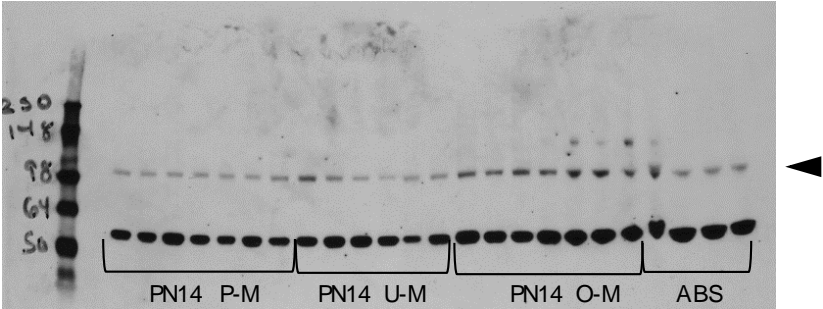

4A.  $\alpha$ -Tubulin comparison in Supp. Fig. 7A

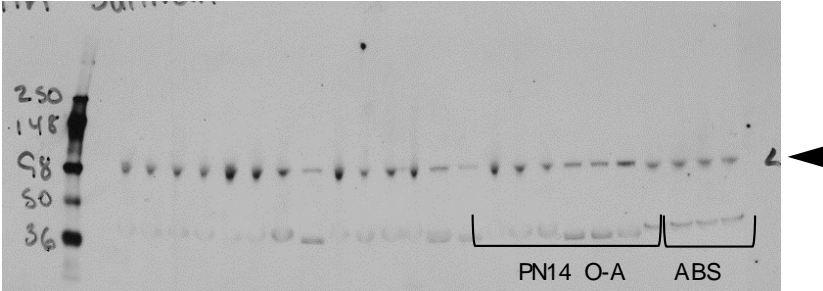

4B.  $\alpha$ -Tubulin comparison in Supp. Fig. 7B

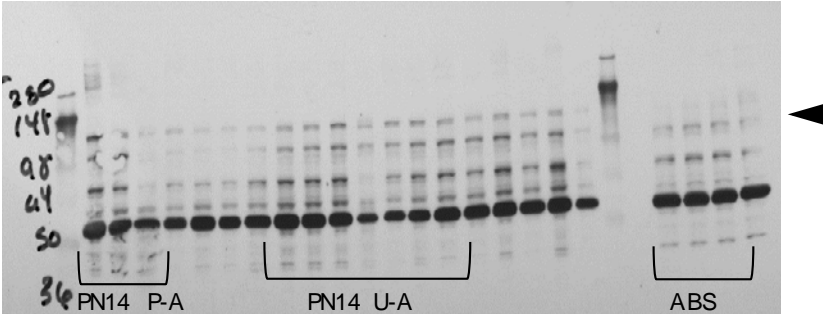

4C.  $\alpha$ -Tubulin comparison in Supp. Fig. 7E

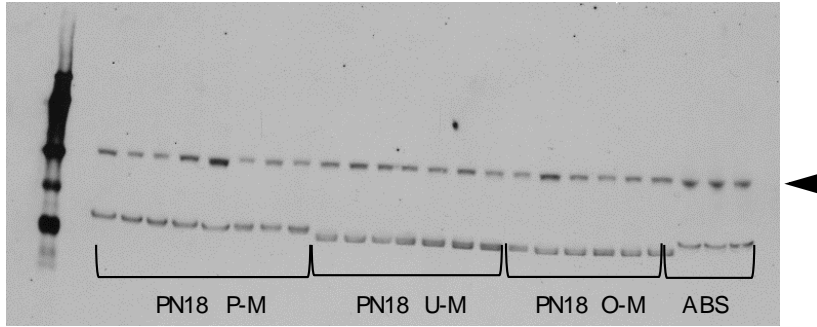

4D.  $\alpha$ -Tubulin comparison in Supp. Fig. 7C

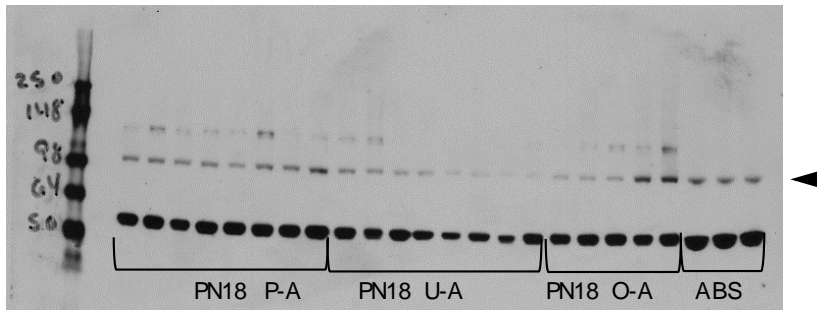

4E.  $\alpha$ -Tubulin comparison in Supp. Fig. 7D

**Figure S4.** Western blot showing GluA1 (100 kDa, arrow) levels in amygdalae of pups conditioned at age postnatal day PN14 and PN18. P-A/U-A/O-A/P-M/U-M/O-M: Paired, Unpaired, Odor only conditioning, alone (A) or with mother (M). ABS: All brain sample, positive control. Empty lanes were loaded with 1x Laemmli Buffer. The same tubulin-corrected values were used for all markers probed. Comparisons were made across gels processed in parallel using samples derived from the same experiment. Unmarked blots were analyzed as part of a different study.
